# Supplementary material
Source: publisher figshare collection journal article supplement (https://acs.figshare.com/ndownloader/files/8009524)
Supplement: Supplementary file 1 [file 8009524]

**Supporting information**

**Highly efficient Blue-Emitting CdSe-derived  
Core/Shell Gradient Alloy Quantum Dots with  
Improved Photoluminescent Quantum Yield and  
Enhanced Photostability**

*Junsang Cho,<sup>a,b</sup> Yun Ku Jung,<sup>a,c</sup> Jin-Kyu Lee,<sup>a</sup> and Hak-Sung Jung<sup>a,d,\*</sup>*

<sup>a</sup> Department of Chemistry, Seoul National University, Seoul 151-747, Korea

<sup>b</sup> Department of Chemistry, Texas A&M University, College station, Texas 77843, United States

<sup>c</sup> Display R&D Center, Samsung Display Co., Ltd., Yongin 446-711, Korea

<sup>d</sup> Laboratory of Molecular Biophysics, National Heart, Lung and Blood Institute, National Institutes of Health, 50 South Drive, Building 50, Bethesda, Maryland 20892, United States

\*email: Haksung.jung@nih.gov, Tel: +1-301-402-3028 Fax: +1-301-402-3404

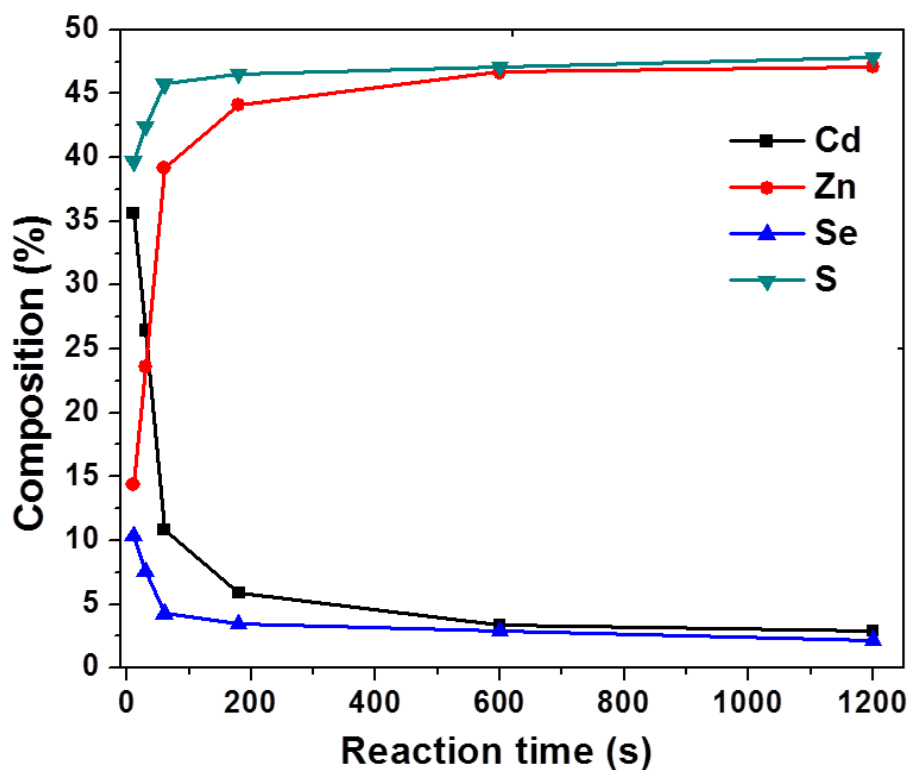

**Figure S1.** ICP-AES measurement of core/shell gradient alloy QDs collected at different reaction time (10, 30, 60, 180, 600, and 1200 s, respectively) for analyzing the element of Cd, Zn, Se, and S, respectively.

**Table S1.** Elemental composition of Cd, Zn, Se, and S for core/shell gradient alloy QDs at different reaction time (10, 30, 60, 180, 600, and 1200 s, respectively).

| Time (s) | Cd   | Zn   | Se   | S    | Total (%) |
|----------|------|------|------|------|-----------|
| 10       | 35.6 | 14.4 | 10.3 | 39.7 | 100       |
| 30       | 26.4 | 23.6 | 7.6  | 42.4 | 100       |
| 60       | 10.8 | 39.2 | 4.2  | 45.8 | 100       |
| 180      | 5.9  | 44.1 | 3.5  | 46.5 | 100       |
| 600      | 3.3  | 46.7 | 2.9  | 47.1 | 100       |
| 1200     | 2.9  | 47.1 | 2.2  | 47.8 | 100       |

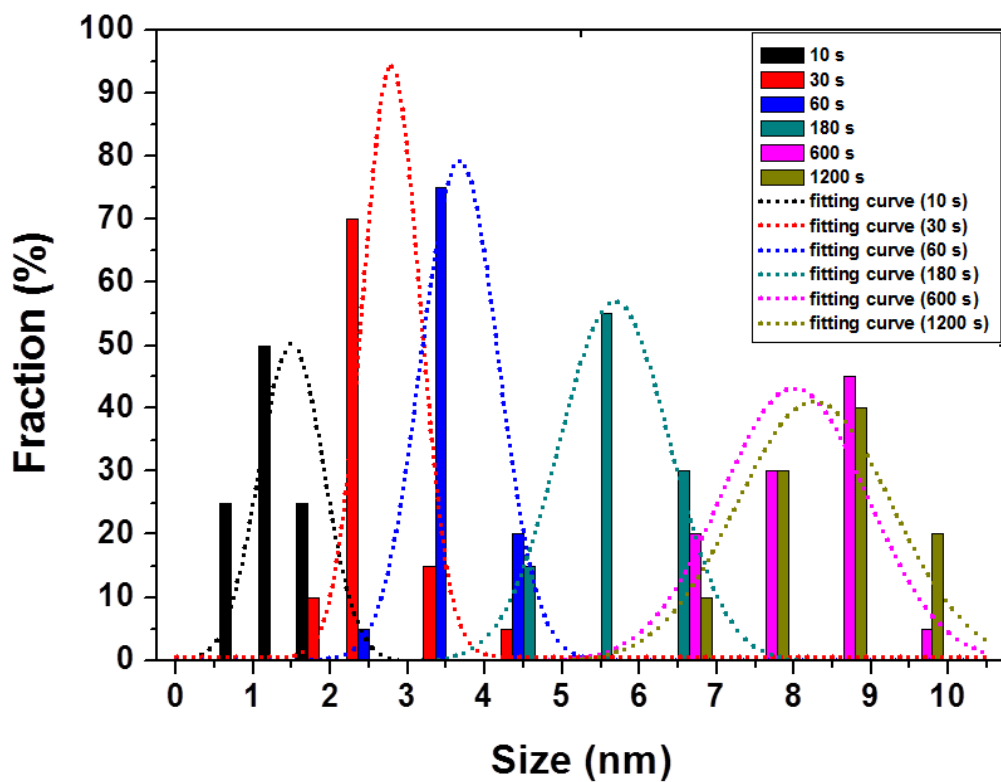

**Figure S2.** Size distribution and histogram curve of collected QDs at different reaction time (10, 30, 60, 180, 600, and 1200 s).

**Table S2.** Size change of QDs as a function of reaction time.

| Time (s) | Average size $\pm$ standard deviation (nm) |
|----------|--------------------------------------------|
| 10       | $1.5 \pm 0.37$                             |
| 30       | $3.0 \pm 0.36$                             |
| 60       | $3.8 \pm 0.35$                             |
| 180      | $5.7 \pm 0.54$                             |
| 600      | $7.6 \pm 0.78$                             |
| 1200     | $8.3 \pm 0.87$                             |

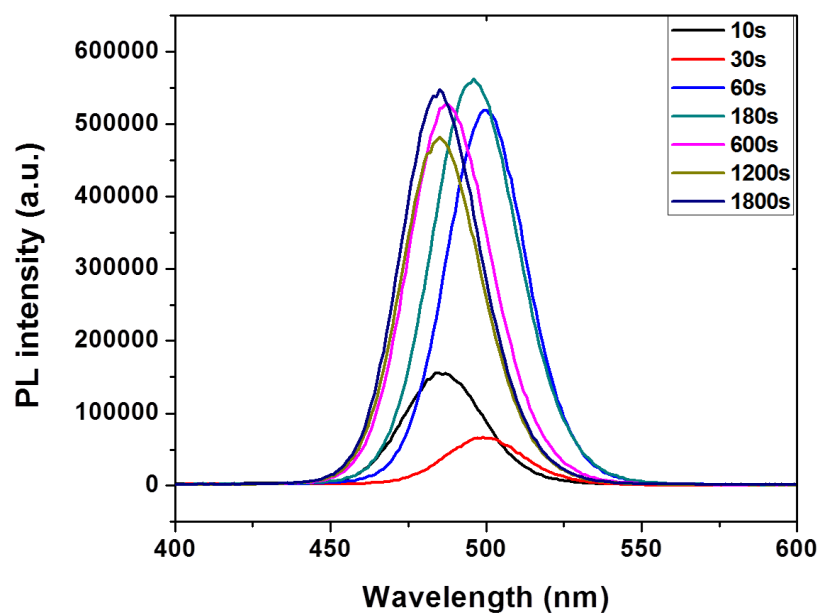

**Figure S3.** Unnormalized PL emission spectra of core/shell gradient alloy QDs at different reaction time (10, 30, 60, 180, 600, and 1200 s, respectively).

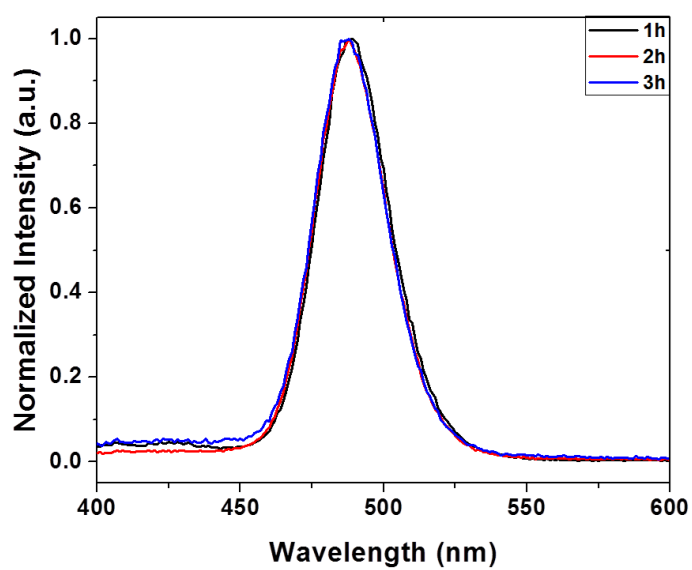

**Figure S4.** PL emission spectra of core/shell gradient alloy QDs at elongated reaction time for 1, 2, and 3 hours, respectively.

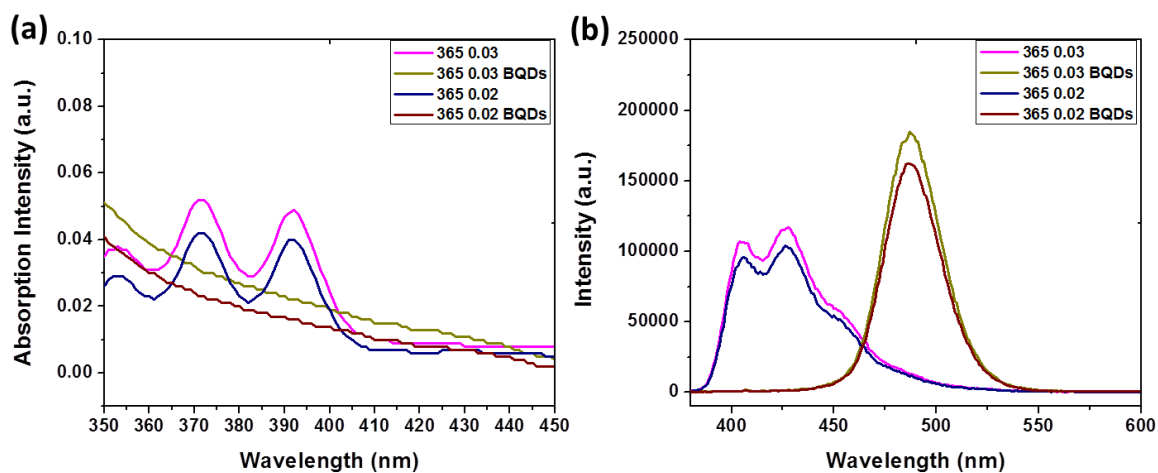

**Figure S5.** (a) UV-vis absorption, (b) PL emission spectra of core/shell gradient alloy QDs and known organic dye (9,10-diphenylanthracene in ethanol) at fixed absorption optical cross section of 0.03.

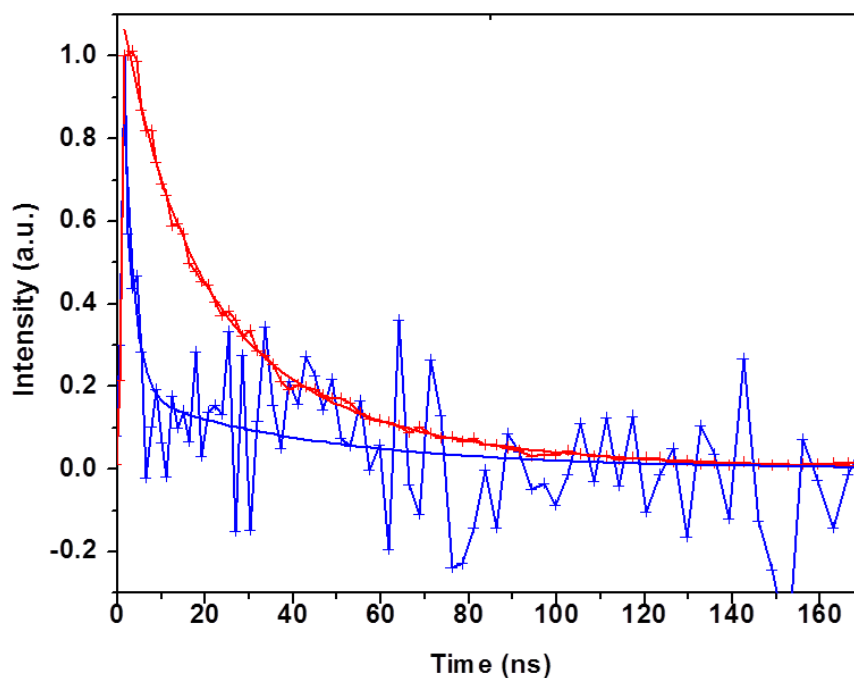

**Figure S6.** PL lifetime decay trace and fitting of core/shell gradient alloy QDs: QDs obtained 10 s (blue line) and QDs obtained at 600 s (red line).

**Table S2.** PL lifetime parameters for core/shell gradient alloy QDs collected at 10s and 600 s, respectively. PL lifetime was calculated as per below equation.

|             | $A_1$ | $\tau_1$ (ns) | $A_2$ | $\tau_2$ (ns) | $\text{Chi}^2$ | $\tau_{\text{ave}}$ (ns) |
|-------------|-------|---------------|-------|---------------|----------------|--------------------------|
| QDs (10s )  | 0.647 | 1.519         | 0.330 | 6.410         | 2.136          | 3.150                    |
| QDs (600 s) | 0.427 | 11.67         | 0.160 | 30.40         | 0.002          | 16.80                    |

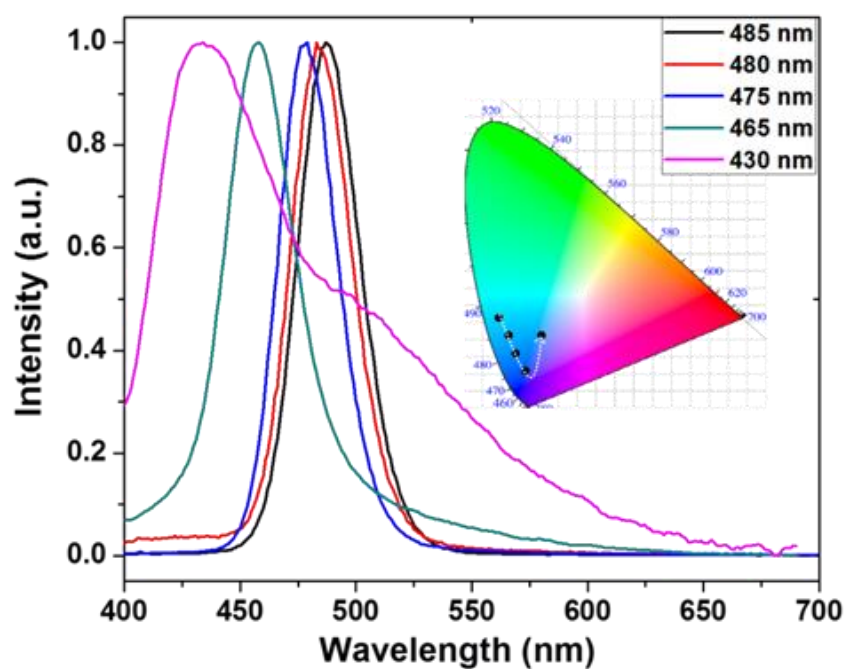

**Figure S7.** PL emission spectra of CSGA QDs tunable in various emission wavelengths (Inset shows the corresponding CIE chromaticity diagram).

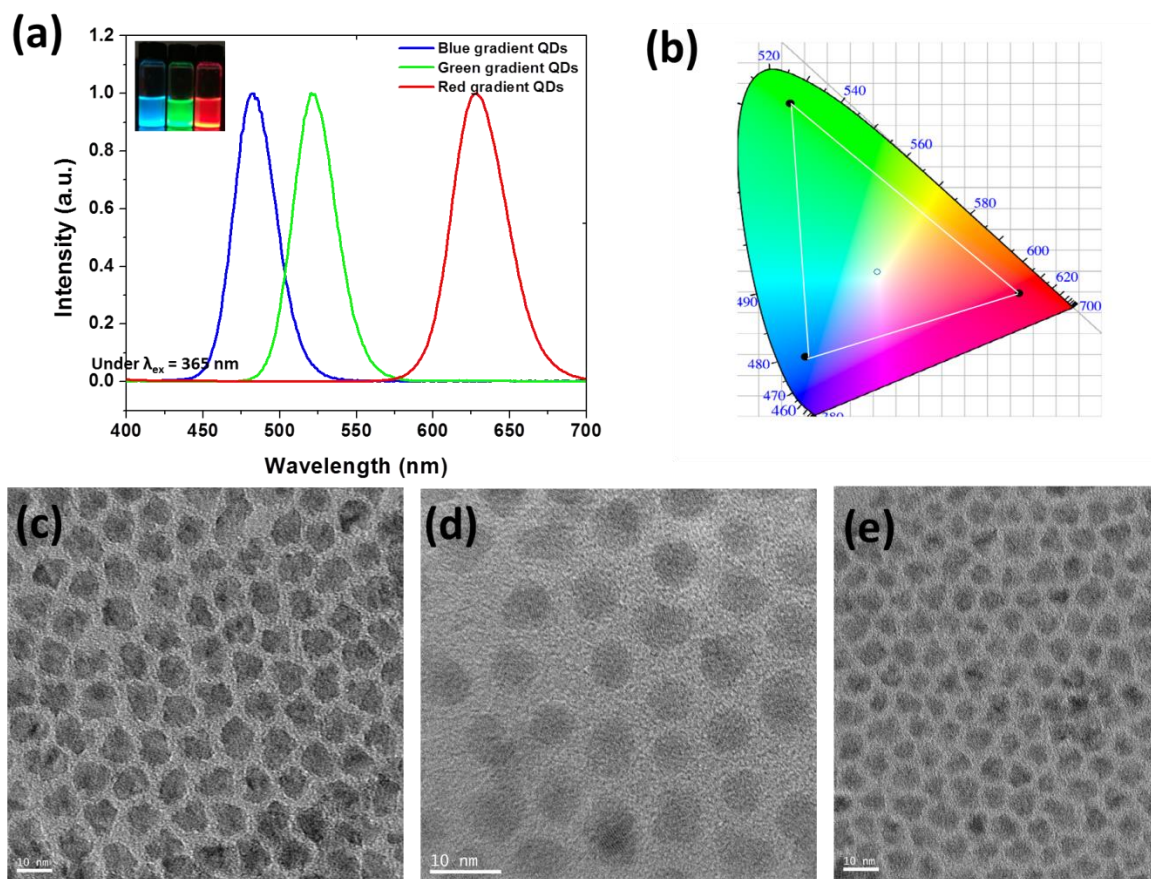

**Figure S8.** (a) PL emission spectra, (b) CIE color diagram, and (c-e) TEM images for blue-, green-, and red-emitting core/shell gradient alloy QDs, respectively.

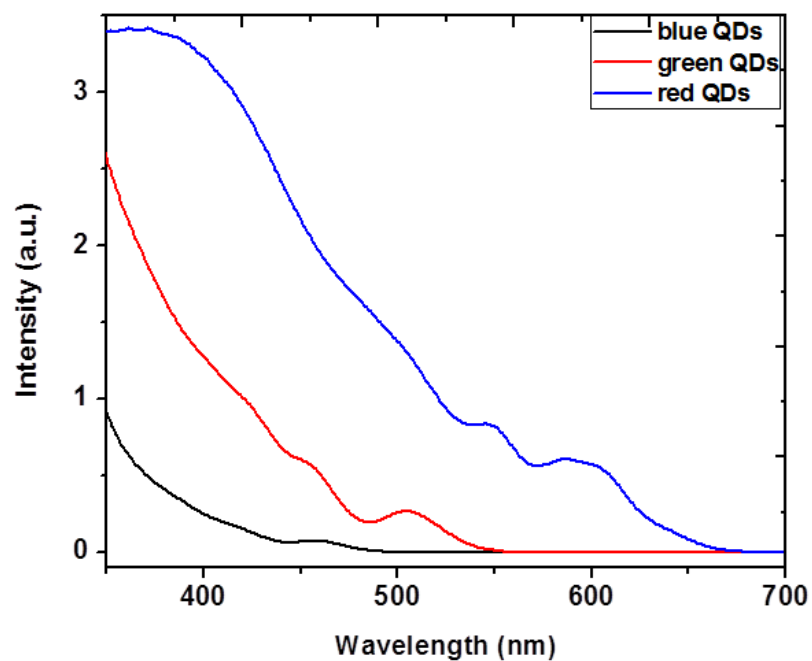

**Figure S9.** UV-vis absorption spectra of blue-, green, and red-emitting CSGA QDs with identical mass of QDs dispersed in hexane.
